# Supplementary material for: Patient-Reported Outcomes of Radiofrequency Ablation versus Video-Assisted Thoracoscopic Surgery for Stage IA NSCLC: A Longitudinal Cohort Study
Source: Research Square preprint supplement (doi:10.21203/rs.3.rs-7727753/v1), 2025-10-29
Supplement: Supplementary file 1 [file b2252f0073a3413a8dd70034.docx]

**Supplementary Figure 1**. Longitudinal Trends in Symptom Burden and Functional Impairment from Postoperative Day 0 to Day 90 in RFA vs. VATS

**Supplementary figure 1** shows the proportion of patients with moderate-to-severe symptoms and functional impairment (score ≥4/10) from baseline to day 90 after RFA or VATS for stage IA NSCLC. Mixed-effects logistic regression adjusted for baseline factors, and chi-square test assessed group differences at POD 30 (e.g., pain, p=0.0039; shortness of breath, p=0.0013; work impairment, p<0.0001). RFA patients had lower symptom burden and faster functional recovery, with differences decreasing by day 90, suggesting RFA as a favorable alternative to VATS. The analytical table were shown in **Supplementary Table 3, 4, 7.** In the RFA group, the proportion of patients experiencing moderate-to-severe symptoms and functional impairment remained relatively low. After a slight increase on POD1 compared to baseline (POD0), symptom severity fluctuated at a low level throughout the postoperative period. In contrast, in the VATS group, moderate-to-severe symptoms showed a significant increase on POD1 relative to baseline (POD0), likely due to postoperative factors such as the placement of a thoracic drainage tube, surgical trauma, and endotracheal intubation. These symptoms then gradually declined between POD2 and POD7. Moreover, these symptoms remained in a state of long-term fluctuation after POD7.

**Supplementary Figure 2.** Recovery Curves for Symptoms and Functional Impairment in RFA vs. VATS

**Supplementary Figure 2** shows the probability of recovery from moderate-to-severe symptoms and functional impairment (score ≥4/10) over POD1-90 after RFA or VATS for stage IA NSCLC. Kaplan–Meier survival analysis estimated recovery probabilities, with log-rank tests for group comparisons. RFA patients showed significantly faster recovery, especially in pain (p<0.0001), fatigue (p<0.0001), shortness of breath (p<0.0001), work (p<0.0001), and walking (p<0.0001), indicating a more favorable recovery profile compared to VATS. For moderate-to-severe symptoms and functions with differing recovery trajectories, the recovery speed in the RFA group was significantly faster than in the VATS group during the early postoperative period (POD1–30). However, in the mid-postoperative period (POD30–90), the recovery rates of both groups gradually leveled off, and by POD90, their recovery levels were comparable. This indicates that RFA achieves a considerable postoperative recovery speed in the early recovery phase.

**Supplementary Figure 3.** Trajectories of MDASI-LC score

**Supplementary Figure 3** illustrates the MDASI-LC scores for symptoms and functional impairment, showing a trend similar to that in Supplementary Figure 2. Specifically, in the RFA group, the mean score exhibited a mild increase at POD1, followed by fluctuations over time. In contrast, the mean score in the VATS group showed a significant postoperative increase, followed by a marked decline between POD2 and POD7, and then a fluctuating downward trend beyond POD7. The P-value indicates the statistical significance of the effects of Group and Group * Time on the scores, while the Estimate values are detailed in **Supplementary Table 6**.
