# Supplementary material for: Patient-Reported Outcomes of Radiofrequency Ablation versus Video-Assisted Thoracoscopic Surgery for Stage IA NSCLC: A Longitudinal Cohort Study
Source: Research Square preprint supplement (doi:10.21203/rs.3.rs-7727753/v1), 2025-10-29
Supplement: Supplementary file 2 [file e3a6086011877bedea1810eb.docx]

**Supplementary Table 1.Data availability of PRO outcomes**

| **Supplementary Table 1.Data availability of PRO outcomes** | | | |
| --- | --- | --- | --- |
| **Time points** | **MDASI-LC** | | **Completion rate** |
| **Available** | **Required** |
| Baseline | 244 | 244 | 100.00% |
| POD 1 | 241 | 244 | 98.77% |
| POD 2 | 235 | 244 | 96.31% |
| POD 3 | 232 | 244 | 95.08% |
| POD 4 | 237 | 244 | 97.13% |
| POD 5 | 232 | 244 | 95.08% |
| POD 6 | 232 | 244 | 95.08% |
| POD 7 | 236 | 244 | 96.72% |
| POD 10 | 232 | 244 | 95.08% |
| POD 14 | 235 | 244 | 96.31% |
| POD 17 | 230 | 244 | 94.26% |
| POD 21 | 231 | 244 | 94.67% |
| POD 30 | 233 | 244 | 95.49% |
| POD 42 | 236 | 244 | 96.72% |
| POD 56 | 232 | 244 | 95.08% |
| POD 60 | 233 | 244 | 95.49% |
| POD 70 | 224 | 244 | 91.80% |
| POD 90 | 210 | 244 | 86.07% |

**Supplementary Table 2.Overall symptom severity**

| **Supplementary Table 2.Overall symptom severity** | | | |  |
| --- | --- | --- | --- | --- |
|  | **MDASI-LC** | | | |
|  | **POD 1-7 days** | | **POD 30-90 days** | |
| **Item** | **No. of Assessments** | **Proportion of Severe** | **No. of Assessments** | **Proportion of Severe** |
| disturbed_sleep | 1645 | 21.09% | 1368 | 4.84% |
| pain | 1645 | 19.21% | 1368 | 6.74% |
| fatigue | 1645 | 18.30% | 1368 | 1.99% |
| shortness_of_breath | 1645 | 17.87% | 1368 | 9.76% |
| constipation | 1645 | 16.72% | 1368 | 7.08% |
| dry_mouth | 1645 | 13.19% | 1368 | 8.89% |
| distressed | 1645 | 13.13% | 1368 | 8.29% |
| coughing | 1645 | 12.34% | 1368 | 4.58% |
| drowsy | 1645 | 10.76% | 1368 | 5.01% |
| remembering | 1645 | 10.15% | 1368 | 7.08% |
| sad | 1645 | 10.09% | 1368 | 5.79% |
| lack_of_appetite | 1645 | 9.42% | 1368 | 1.38% |
| sore_throat | 1645 | 6.50% | 1368 | 4.58% |
| numbness | 1645 | 5.35% | 1368 | 7.60% |
| nausea | 1645 | 4.86% | 1368 | 5.53% |
| vomiting | 1645 | 2.92% | 1368 | 2.68% |
| Work | 1645 | 19.94% | 1368 | 6.99% |
| Walking | 1645 | 16.84% | 1368 | 6.30% |
| General_activity | 1645 | 16.53% | 1368 | 8.64% |
| Enjoyment | 1645 | 14.77% | 1368 | 5.09% |
| Mood | 1645 | 13.01% | 1368 | 7.77% |
| Relations | 1645 | 8.02% | 1368 | 7.34% |

**Supplementary Table 3. Relative risk at POD7**

| **Supplementary Table 3. Relative risk at POD7** | | | | | | |
| --- | --- | --- | --- | --- | --- | --- |
|  | **RFA vs.VATS with Values Adjusted** | | | **RFA vs.VATS with Values Unadjusted** | | |
| **Item** | **RR** | **95% CI** | p Value | **RR** | **95% CI** | p Value |
| pain | 0.11 | 0.05_to_0.28 | **<0.0001** | 0.11 | 0.04_to_0.26 | **<0.0001** |
| fatigue | 0.16 | 0.07_to_0.4 | **<0.0001** | 0.16 | 0.07_to_0.38 | **<0.0001** |
| nausea | 0.19 | 0.04_to_1.02 | 0.0525 | 0.18 | 0.04_to_0.91 | **0.0378** |
| disturbed_sleep | 0.22 | 0.1_to_0.5 | **0.0003** | 0.23 | 0.1_to_0.5 | **0.0002** |
| distressed | 0.13 | 0.03_to_0.47 | **0.0020** | 0.11 | 0.03_to_0.41 | **0.0009** |
| shortness_of_breath | 0.13 | 0.06_to_0.29 | **<0.0001** | 0.15 | 0.07_to_0.33 | **<0.0001** |
| remembering | 0.35 | 0.12_to_1.03 | 0.0558 | 0.28 | 0.1_to_0.78 | **0.0144** |
| lack_of_appetite | 0.13 | 0.03_to_0.48 | **0.0023** | 0.13 | 0.03_to_0.45 | **0.0015** |
| drowsy | 0.12 | 0.03_to_0.45 | **0.0017** | 0.13 | 0.03_to_0.45 | **0.0015** |
| dry_mouth | 0.25 | 0.09_to_0.66 | **0.0056** | 0.28 | 0.11_to_0.72 | **0.0083** |
| sad | 0.20 | 0.07_to_0.62 | **0.0050** | 0.19 | 0.07_to_0.56 | **0.0025** |
| vomiting | 0.50 | 0.08_to_3.33 | 0.4774 | 0.45 | 0.07_to_2.77 | 0.3915 |
| numbness | 0.48 | 0.14_to_1.66 | 0.2440 | 0.47 | 0.14_to_1.55 | 0.2145 |
| coughing | 0.12 | 0.04_to_0.31 | **<0.0001** | 0.12 | 0.05_to_0.31 | **<0.0001** |
| constipation | 0.54 | 0.25_to_1.2 | 0.1298 | 0.51 | 0.24_to_1.09 | 0.0836 |
| sore_throat | 0.12 | 0.02_to_0.64 | **0.0129** | 0.16 | 0.03_to_0.77 | **0.0221** |
| General_activity | 0.12 | 0.05_to_0.3 | **<0.0001** | 0.13 | 0.05_to_0.3 | **<0.0001** |
| Mood | 0.14 | 0.05_to_0.38 | **0.0001** | 0.13 | 0.05_to_0.35 | **<0.0001** |
| Work | 0.21 | 0.1_to_0.45 | **<0.0001** | 0.2 | 0.09_to_0.41 | **<0.0001** |
| Relations | 0.08 | 0.02_to_0.38 | **0.0014** | 0.07 | 0.02_to_0.31 | **0.0005** |
| Walking | 0.15 | 0.06_to_0.35 | **<0.0001** | 0.16 | 0.07_to_0.37 | **<0.0001** |
| Enjoyment | 0.19 | 0.07_to_0.49 | **0.0006** | 0.18 | 0.07_to_0.45 | **0.0002** |

**Supplementary Table 4. Relative risk at postoperative 30 day**

| **Supplementary Table 4. Relative risk at POD30** | | | | | | |
| --- | --- | --- | --- | --- | --- | --- |
|  | **RFA vs.VATS with Values Adjusted** | | | **RFA vs.VATS with Values Unadjusted** | | |
| **Item** | **RR** | **95% CI** | p **Value** | **RR** | **95% CI** | p **Value** |
| pain | 0.13 | 0.03_to_0.53 | **0.0039** | 0.13 | 0.03_to_0.46 | **0.0017** |
| fatigue | 0.34 | 0.1_to_1.12 | 0.0760 | 0.32 | 0.11_to_0.9 | **0.0304** |
| nausea | 0.92 | 0.1_to_8.88 | 0.9457 | 0.64 | 0.09_to_4.64 | 0.6586 |
| disturbed_sleep | 0.52 | 0.19_to_1.39 | 0.1904 | 0.44 | 0.18_to_1.1 | 0.0803 |
| distressed | 0.24 | 0.07_to_0.84 | **0.0259** | 0.21 | 0.06_to_0.68 | **0.0092** |
| shortness_of_breath | 0.17 | 0.06_to_0.5 | **0.0013** | 0.2 | 0.07_to_0.54 | **0.0015** |
| remembering | 0.27 | 0.09_to_0.85 | **0.0252** | 0.26 | 0.09_to_0.79 | **0.0169** |
| lack_of_appetite | 0.27 | 0.07_to_1.06 | 0.0613 | 0.35 | 0.1_to_1.23 | 0.1004 |
| drowsy | 0.18 | 0.05_to_0.73 | **0.0160** | 0.17 | 0.05_to_0.65 | **0.0093** |
| dry_mouth | 0.71 | 0.24_to_2.11 | 0.5422 | 0.82 | 0.29_to_2.3 | 0.7000 |
| sad | 0.30 | 0.08_to_1.09 | 0.0675 | 0.26 | 0.08_to_0.88 | **0.0306** |
| vomiting | 0.73 | 0.09_to_5.96 | 0.7706 | 0.64 | 0.09_to_4.64 | 0.6586 |
| numbness | 0.29 | 0.09_to_0.91 | **0.0339** | 0.29 | 0.1_to_0.89 | **0.0307** |
| coughing | 0.06 | 0.01_to_0.25 | **0.0002** | 0.06 | 0.01_to_0.27 | **0.0002** |
| constipation | 0.39 | 0.12_to_1.31 | 0.1280 | 0.38 | 0.12_to_1.2 | 0.0982 |
| sore_throat | 0.35 | 0.05_to_2.37 | 0.2849 | 0.42 | 0.07_to_2.58 | 0.3491 |
| General_activity | 0.14 | 0.04_to_0.44 | **0.0008** | 0.16 | 0.06_to_0.47 | **0.0008** |
| Mood | 0.22 | 0.06_to_0.79 | **0.0204** | 0.21 | 0.06_to_0.68 | **0.0092** |
| Work | 0.18 | 0.07_to_0.5 | **<0.0001** | 0.2 | 0.08_to_0.51 | **0.0008** |
| Relations | 0.10 | 0.02_to_0.48 | **0.0043** | 0.09 | 0.02_to_0.42 | **0.0022** |
| Walking | 0.15 | 0.04_to_0.52 | **0.0026** | 0.2 | 0.07_to_0.57 | **0.0027** |
| Enjoyment | 0.12 | 0.03_to_0.4 | **<0.0001** | 0.14 | 0.05_to_0.45 | **0.0009** |

**Supplementary Table 5. Complications**

| **Supplementary Table 5. Complications in postoperative 30 days.** | | | | | |
| --- | --- | --- | --- | --- | --- |
|  | **Complication** | | | |  |
| **Item** | **RFA** | **proportion** | **VATS** | **proportion** | **p value** |
| Postoperative Pneumothorax | 8 | 4.88% | 1 | 1.25% | 0.2938 |
| Postoperative Pleural Effusion | 16 | 9.76% | 5 | 6.25% | 0.5006 |
| Postoperative Pneumonia | 2 | 1.22% | 0 | 0.00% | N/A |
| Atelectasis | 1 | 0.61% | 0 | 0.00% | N/A |
| Postoperative Hemoptysis | 3 | 1.83% | 0 | 0.00% | N/A |
| Subcutaneous Emphysema | 1 | 0.61% | 0 | 0.00% | N/A |

**Supplementary Table 6. PRO POD0-90 Mixed effect model outcomes**

| **Supplementary Table 6. PRO POD0-90 Mixed effect model outcomes** | | | | | | | | | |
| --- | --- | --- | --- | --- | --- | --- | --- | --- | --- |
| **Items** | **RFA versus VATS** | | | | | | | | |
|  | **Group** | | | **Time** | | | **Group*Time** | | |
| **Symptom** | **Estimate** | **SE** | **p value** | **Estimate** | **SE** | **p value** | **Estimate** | **SE** | **p value** |
| pain | -1.67931 | -0.18024 | **<0.0001** | 0.16729 | -0.03986 | **0.00004** | 0.64473 | -0.06376 | **<0.0001** |
| fatigue | -1.13934 | -0.20576 | **<0.0001** | 0.07689 | -0.04683 | 0.10238 | 0.47641 | -0.07446 | **<0.0001** |
| nausea | -0.45024 | -0.13033 | **0.0007** | 0.02863 | -0.03262 | 0.38124 | 0.16956 | -0.05197 | **0.00133** |
| disturbed.sleep | -1.00517 | -0.23242 | **<0.0001** | 0.09119 | -0.05513 | 0.09983 | 0.33340 | -0.08778 | **0.00020** |
| distressed | -0.90598 | -0.21158 | **<0.0001** | 0.04703 | -0.04413 | 0.28804 | 0.28936 | -0.07023 | **0.00006** |
| shortness.of.breath | -1.21564 | -0.20399 | **<0.0001** | 0.06884 | -0.04614 | 0.13752 | 0.29974 | -0.07352 | **0.00007** |
| remembering | -0.40798 | -0.20980 | 0.05331 | 0.02887 | -0.04147 | 0.48722 | 0.01171 | -0.06592 | 0.85922 |
| lack.of.appetite | -0.80275 | -0.18287 | **<0.0001** | 0.03176 | -0.04058 | 0.43484 | 0.22795 | -0.06460 | **0.00053** |
| drowsy | -0.69047 | -0.17892 | **0.0002** | 0.03111 | -0.03918 | 0.42829 | 0.27882 | -0.06246 | **0.00001** |
| dry.mouth | -0.46414 | -0.24853 | 0.06340 | 0.08843 | -0.04659 | 0.05929 | 0.24656 | -0.07419 | **0.00107** |
| sad | -0.58355 | -0.21245 | **0.00660** | 0.00794 | -0.03777 | 0.83370 | 0.20370 | -0.06010 | **0.00086** |
| vomiting | -0.28488 | -0.11680 | **0.01566** | 0.00598 | -0.02535 | 0.81383 | 0.09397 | -0.04055 | **0.02170** |
| numbness | -0.71829 | -0.16682 | **<0.0001** | -0.00720 | -0.03627 | 0.84287 | 0.08279 | -0.05780 | 0.15374 |
| coughing | -1.31680 | -0.17495 | **<0.0001** | 0.07124 | -0.04833 | 0.14229 | 0.21338 | -0.07682 | **0.00605** |
| constipation | -0.70829 | -0.21025 | **<0.0001** | 0.17592 | -0.04830 | **0.00036** | 0.26884 | -0.07704 | **0.00061** |
| sore.throat | -0.53102 | -0.14494 | **0.0003** | 0.03370 | -0.03786 | 0.37461 | 0.21822 | -0.06019 | **0.00037** |
| General.activity | -1.40994 | -0.20400 | **<0.0001** | 0.10205 | -0.04606 | **0.02800** | 0.36004 | -0.07332 | **<0.0001** |
| Mood | -0.90895 | -0.21499 | **<0.0001** | 0.02697 | -0.03967 | 0.49749 | 0.23813 | -0.06316 | **0.00022** |
| Work | -1.27877 | -0.25263 | **<0.0001** | 0.17847 | -0.05730 | **0.00215** | 0.25553 | -0.09097 | **0.00550** |
| Relations | -0.61962 | -0.19137 | **0.00143** | -0.00911 | -0.04602 | 0.84331 | 0.08174 | -0.07299 | 0.26422 |
| Walking | -1.18652 | -0.21440 | **<0.0001** | 0.08065 | -0.04906 | 0.10193 | 0.32996 | -0.07798 | **0.00004** |
| Enjoyment | -0.87509 | -0.22448 | **0.0001** | 0.03627 | -0.04222 | 0.39149 | 0.25695 | -0.06722 | **0.00018** |
| Statistically significant values are given in bold (p ＜0.05) | | | | | | | | | |
| Adjusted variables: Sex, postoperative hospital duration, Maximum diameter. | | | | | | | | | |
| Group*time refers to the interaction between groups and the total time | | | | | | | | | |

**Supplementary Table 7. Relative risk at POD 90**

| **Supplementary Table 7. Relative risk at POD 90** | | | | | | | |
| --- | --- | --- | --- | --- | --- | --- | --- |
|  | **RFA vs.VATS with Values Adjusted** | | | | **RFA vs.VATS with Values Unadjusted** | | |
| **Item** | **RR** | **95% CI** | ***p* Value** | **RR** | | **95% CI** | ***p* Value** |
| pain | 0.52 | 0.09_to_2.98 | 0.4610 | 0.51 | | 0.11_to_2.34 | 0.3866 |
| fatigue | 0.91 | 0.21_to_3.86 | 0.8936 | 0.77 | | 0.22_to_2.66 | 0.6807 |
| nausea | 0.14 | 0.01_to_1.42 | 0.0953 | 0.19 | | 0.03_to_1.04 | 0.0554 |
| disturbed_sleep | 0.53 | 0.17_to_1.61 | 0.2616 | 0.48 | | 0.19_to_1.21 | 0.1207 |
| distressed | 1.50 | 0.36_to_6.23 | 0.5779 | 1.08 | | 0.33_to_3.53 | 0.8965 |
| shortness_of_breath | 0.62 | 0.18_to_2.07 | 0.4338 | 0.53 | | 0.19_to_1.46 | 0.2192 |
| remembering | **0.31** | 0.1_to_0.93 | **0.0369** | 0.40 | | 0.15_to_1.03 | 0.0576 |
| lack_of_appetite | 3.14 | 0.46_to_21.61 | 0.2444 | 1.81 | | 0.38_to_8.6 | 0.4579 |
| drowsy | 0.37 | 0.07_to_2.11 | 0.2653 | 0.51 | | 0.11_to_2.34 | 0.3866 |
| dry_mouth | 0.45 | 0.14_to_1.44 | 0.1810 | 0.41 | | 0.15_to_1.11 | 0.0785 |
| sad | 2.01 | 0.35_to_11.45 | 0.4329 | 1.59 | | 0.33_to_7.72 | 0.5620 |
| vomiting* | 69329693.95 | N/A | N/A | 29218467.18 | | N/A | N/A |
| numbness | 0.83 | 0.16_to_4.32 | 0.8263 | 0.38 | | 0.09_to_1.55 | 0.1761 |
| coughing | 0.67 | 0.21_to_2.19 | 0.5130 | 0.47 | | 0.17_to_1.33 | 0.1567 |
| constipation | 1.76 | 0.25_to_12.61 | 0.5729 | 0.77 | | 0.19_to_3.2 | 0.7234 |
| sore_throat | 2.08 | 0.16_to_27.71 | 0.5784 | 1.58 | | 0.17_to_14.41 | 0.6852 |
| General_activity | 1.20 | 0.26_to_5.48 | 0.8134 | 0.77 | | 0.22_to_2.66 | 0.6807 |
| Mood | 1.12 | 0.25_to_5 | 0.8854 | 0.77 | | 0.22_to_2.66 | 0.6807 |
| Work | 0.66 | 0.18_to_2.43 | 0.5325 | 0.36 | | 0.12_to_1.08 | 0.0692 |
| Relations | 0.92 | 0.24_to_3.52 | 0.9043 | 0.61 | | 0.19_to_1.93 | 0.3972 |
| Walking | 1.25 | 0.28_to_5.53 | 0.7716 | 0.61 | | 0.19_to_1.93 | 0.3972 |
| Enjoyment | 0.77 | 0.18_to_3.3 | 0.7196 | 0.69 | | 0.22_to_2.14 | 0.5163 |

*Since the number of moderate-to-severe vomiting cases at POD90 was 0 in the VATS group and only 2 in the RFA group, the sample size is too small to yield statistically meaningful results.
