# Supplementary figures and images for: Patient-Reported Outcomes of Radiofrequency Ablation versus Video-Assisted Thoracoscopic Surgery for Stage IA NSCLC: A Longitudinal Cohort Study
Source: Research Square preprint supplement (doi:10.21203/rs.3.rs-7727753/v1), 2025-10-29

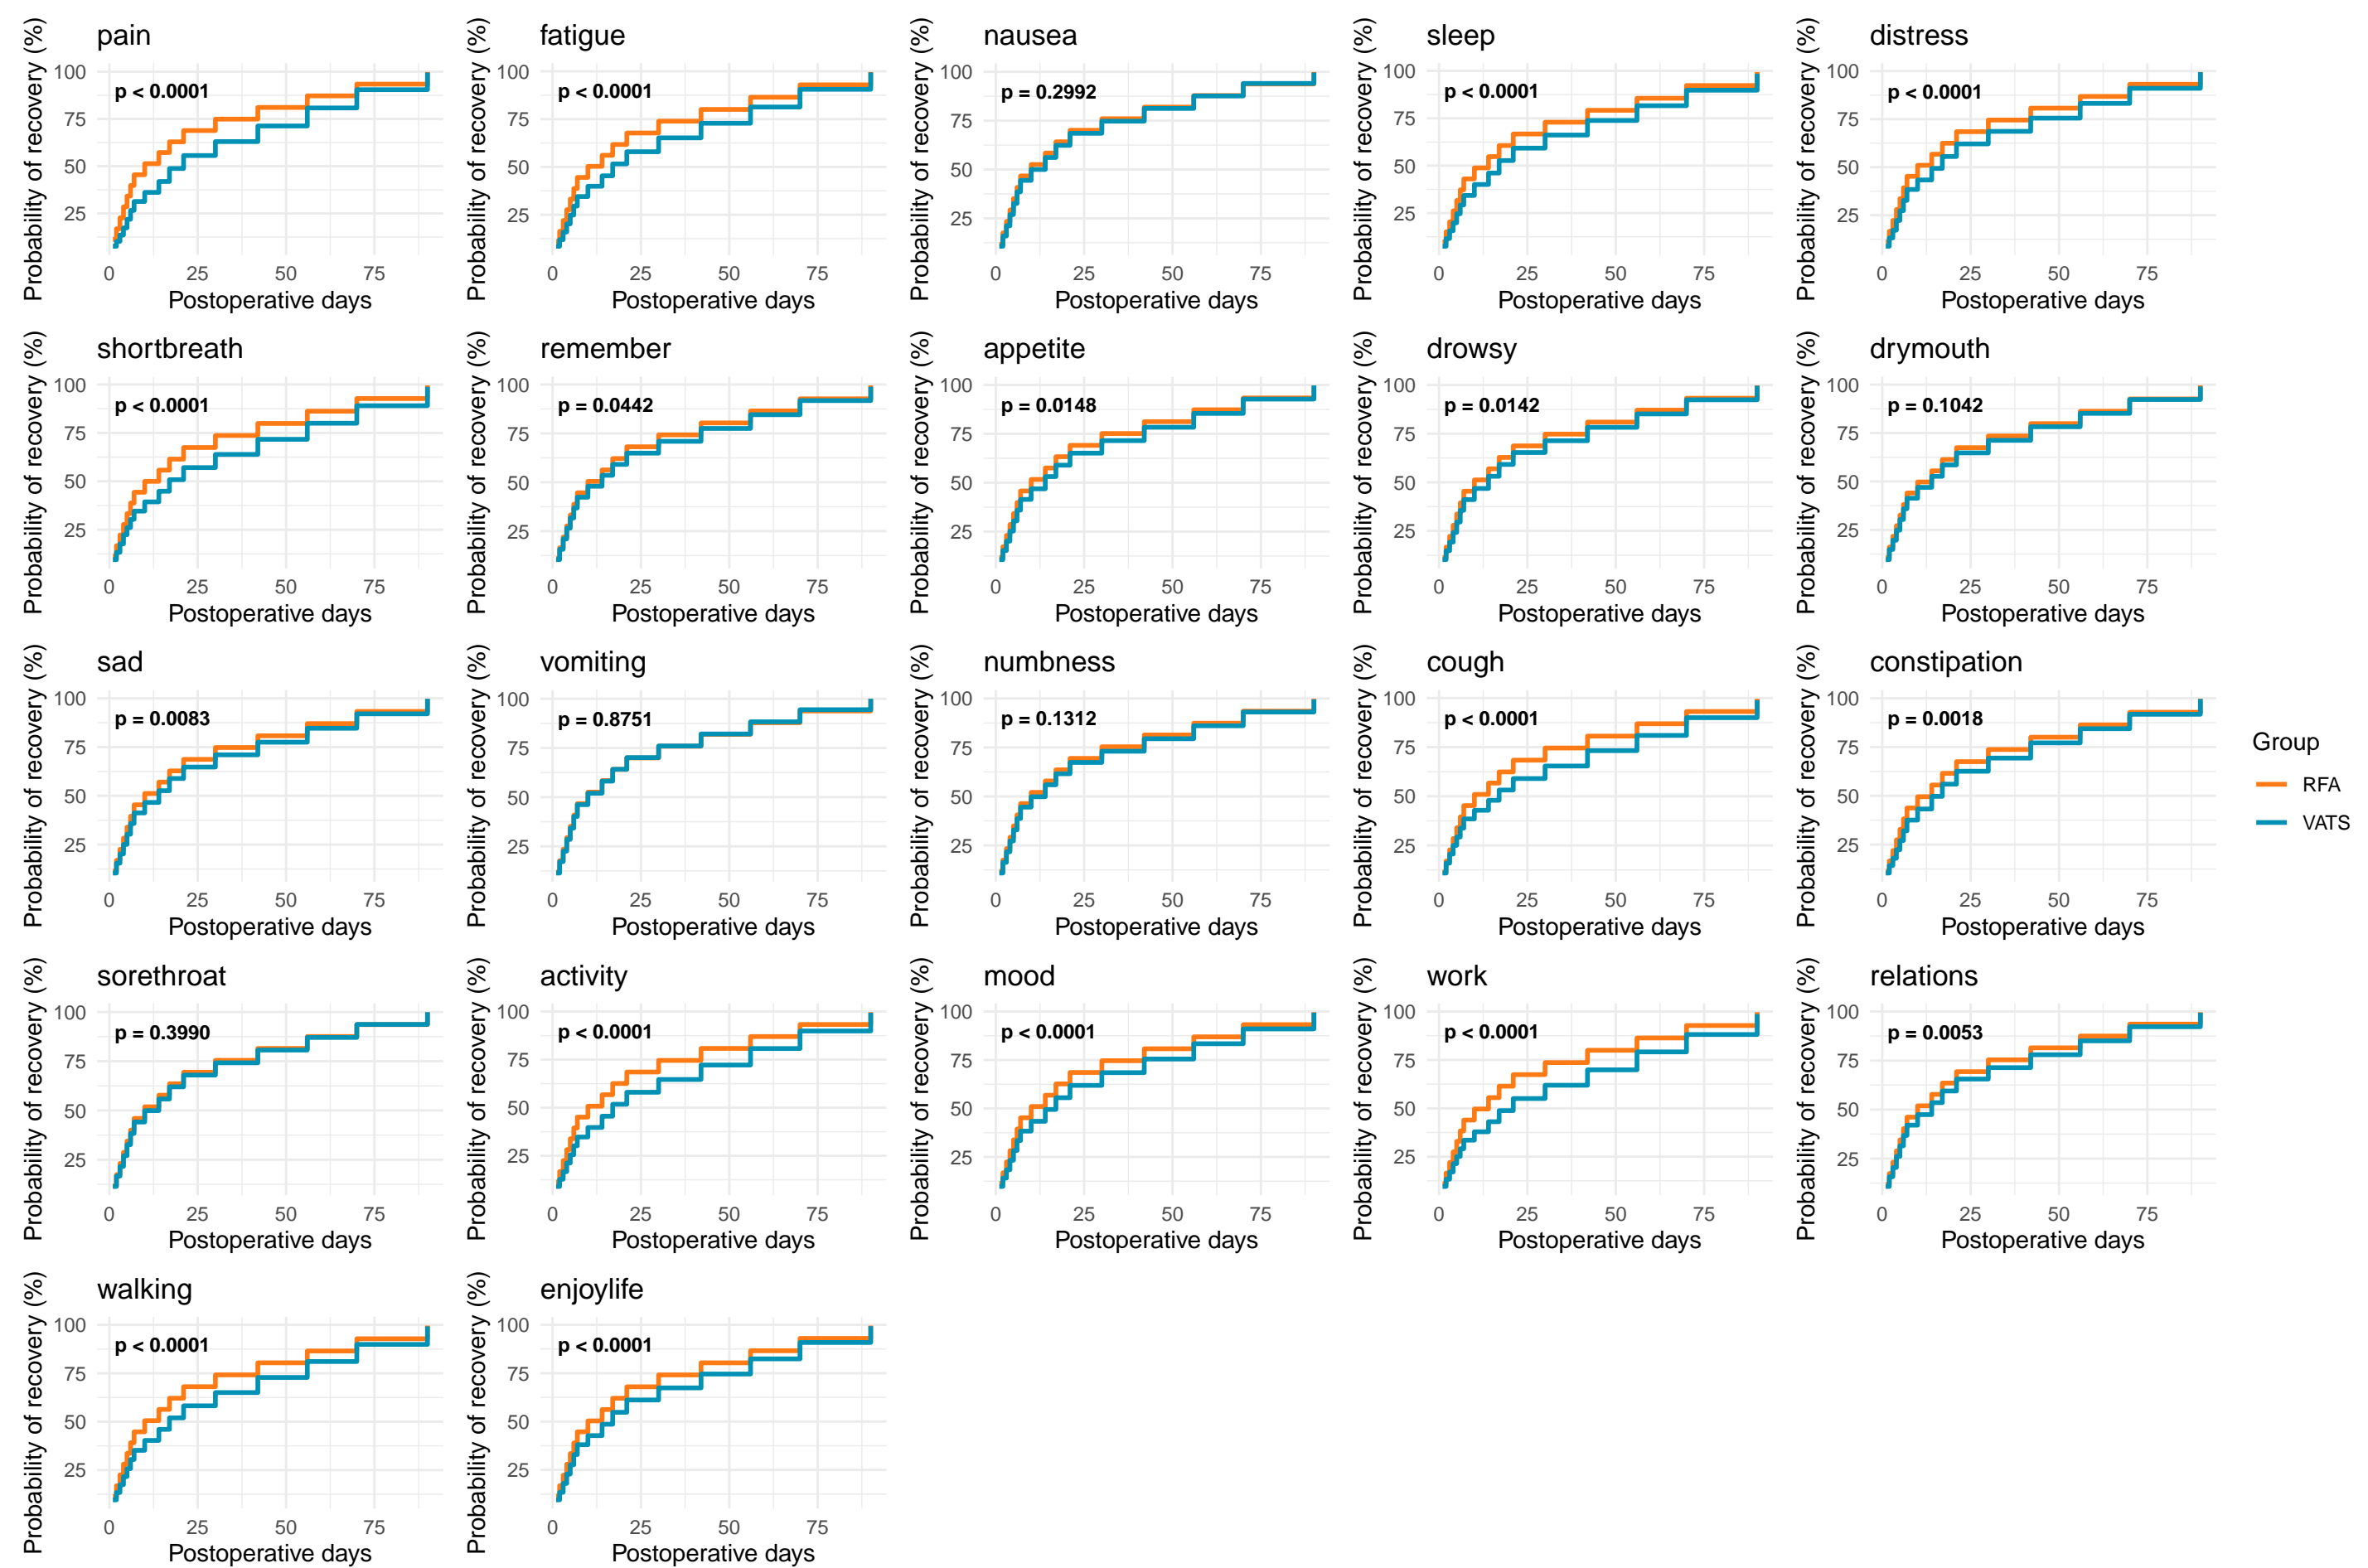

Supplement: Supplementary file 1 [file 81253739a6db44246de1594c.pdf]
